# Supplementary material
Source: publisher site journal article supplement (https://www.dovepress.com/article/584734)
Supplement: Supplementary file 1 [file Supplementary%20Materials.pdf]

**Supplementary Table 1** Muscle strength and power parameters of the whole group and divided into low, medium and high last 10 years PA.

| Characteristics          | Total                                         | Low PA                                        | Medium PA                                     | High PA                                       | ANOVA/<br>Kruskal-<br>Wallis |
|--------------------------|-----------------------------------------------|-----------------------------------------------|-----------------------------------------------|-----------------------------------------------|------------------------------|
|                          | Mean ±<br>SD/Median<br>(quartile)<br><br>N=59 | Mean ±<br>SD/Median<br>(quartile)<br><br>N=19 | Mean ±<br>SD/Median<br>(quartile)<br><br>N=20 | Mean ±<br>SD/Median<br>(quartile)<br><br>N=20 |                              |
| Handgrip strength (kg)   | 44.7±8.87                                     | 44.4±7.09                                     | 43.1±8.89                                     | 46.8±10.3                                     | NS                           |
| Leg Extension 1RM R (kg) | 55.0<br>(45.0; 65.0)                          | 60.50<br>(50.0;60.0)                          | 55.0<br>(45.0;65.0)                           | 55.0<br>(40.0;65.0)                           | NS                           |
| Leg Extension 1RM L (kg) | 55.0<br>(45.0; 65.0)                          | 60.0<br>(50.0;60.0)                           | 50.0<br>(40.0;65.0)                           | 55.0<br>(50.0;65.0)                           | NS                           |
| Leg Press 1RM (kg)       | 200.0<br>(160.0; 250.0)                       | 205.0<br>(160;240)                            | 190.0<br>(150.0;250.0)                        | 200.0<br>(190.0;260.0)                        | NS                           |
| Wrist                    | 142.3<br>(118.3; 180.6)                       | 148.6<br>(123.2;180.6)                        | 152.6<br>(116.1;181.0)                        | 136.0<br>(117.9;171.0)                        | NS                           |
| Elbow Extension          | 179.7<br>(149.0; 197.0)                       | 181.3<br>(143.0;201.6)                        | 169.9<br>(148.1;197.0)                        | 179.7<br>(152.1;203.5)                        | NS                           |
| Elbow Flexion            | 229.5<br>(208.2; 272.2)                       | 231.2<br>(210.4;275.8)                        | 222.4<br>(198.1;271.8)                        | 231.8<br>(206.9;276.1)                        | NS                           |
| Shoulder Extension       | 262.9<br>(216.6; 296.3)                       | 267.1<br>(229.1;290.0)                        | 254.4<br>(203.3;274.0)                        | 271.2<br>(224.3;326.5)                        | NS                           |
| Shoulder Flexion         | 225.5<br>(193.0; 258.9)                       | 238.8<br>(181.6;258.9)                        | 225.5<br>(197.5;263.1)                        | 225.3<br>(193.0;257.4)                        | NS                           |
| Shoulder Abduction       | 193.5<br>(163.0; 220.0)                       | 197.4<br>(173.9;220.0)                        | 193.5<br>(142.3;211.3)                        | 193.1<br>(158.2;232.2)                        | NS                           |
| Hip Flexion              | 185.2<br>(161.0; 205.9)                       | 185.1<br>(170.8;207.3)                        | 175.2<br>(150.0; 214.4)                       | 190.8<br>(167.1;204.3)                        | NS                           |
| Hip Abduction            | 205.1<br>(179.3; 244.2)                       | 201.8<br>(179.3;259.3)                        | 202.4<br>(175.9;224.0)                        | 220.6<br>(182.6;270.6)                        | NS                           |
| Ankle Dorsiflexion       | 175.0<br>(156.0; 197.5)                       | 178.0<br>(144.5;199.7)                        | 176.1<br>(167.2;194.8)                        | 171.5<br>(136.6;199.3)                        | NS                           |
| Knee Extension           | 320.0<br>(282.9; 360.3)                       | 323.6<br>(283.8;364.6)                        | 336.0<br>(282.9;360.3)                        | 316.8<br>(277.7;391.0)                        | NS                           |
| Knee Flexion             | 221.1<br>(192.6; 247.8)                       | 237.0<br>(205.1;254.0)                        | 207.3<br>(190.8;245.5)                        | 225.3<br>(194.6;245.8)                        | NS                           |
| P40% LE R (W)            | 237.0<br>(182.0; 285.0)                       | 250.5<br>(182.0;286.0)                        | 253.0<br>(187.0;284.0)                        | 225.0<br>(177.0;293.0)                        | NS                           |
| P70% LE R (W)            | 308.0<br>(224.0; 382.0)                       | 317.0<br>(263.0;373.0)                        | 300.0<br>(224.0;382.0)                        | 304.0<br>(210.0;384.0)                        | NS                           |
| P40% LE L (W)            | 235.0<br>(187.0; 294.0)                       | 267.0<br>(198.0;300.0)                        | 227.0<br>(183.0;292.0)                        | 227.0<br>(167.0;291.0)                        | NS                           |
| P70% LE L (W)            | 278.5<br>(216.0; 352.0)                       | 297.0<br>(249.0;400.0)                        | 266.0<br>(216.0;352.0)                        | 248.0<br>(196.0;337.0)                        | NS                           |
| P40% LP (W)              | 1122.0<br>(969.0; 1343.0)                     | 1189.5<br>(1012.0;1343.0)                     | 1068.5<br>(891.0;1307.0)                      | 1077.0<br>(957.0;1414.0)                      | NS                           |
| P70% LP (W)              | 1153.0<br>(1011.0;1469.0)                     | 1321.5<br>(1030.0;1694.0)                     | 1137.5<br>(988.0;1389.0)                      | 1124.0<br>(1011.0;1447.0)                     | NS                           |
| Pmax (W)                 | 509.6<br>(382.0; 572.0)                       | 519.0<br>(398.5;591.6)                        | 483.0<br>(387.7;569.0)                        | 509.6<br>(360.5;571.3)                        | NS                           |
| Pmax·kg-1 (W·kg-1)       | 6.03<br>(4.78; 7.41)                          | 6.22<br>(4.73;7.21)                           | 6.12<br>(4.73;8.27)                           | 6.02<br>(5.40;7.25)                           | NS                           |
| uopt (rpm)               | 89.4±17.3                                     | 88.4±15.4                                     | 90.9±13.2                                     | 89.0±17.2                                     | NS                           |

**Abbreviations:** **1RM R** – one repetition maximum, right leg; **1RM L** – one repetition maximum, left leg; **P40% LE R** – muscle power of low force/high velocity (40%), leg extension, right leg; **P70% LE R** – muscle power of high force/low velocity (70%), leg extension, right leg; **P40% LE L** – muscle power of low force/high velocity (40%), leg extension, left leg; **P70% LE L** – muscle power of high force/low velocity (70%), leg extension, left leg; **P40% LP** – muscle power of low force/high velocity (40%), leg press; **P70% LP** – muscle power of high force/low velocity (70%), leg press; **Pmax** – maximal short-term power; **Pmax·kg-1** – maximal short-term power relative to body mass; **uopt** – optimal movement velocity corresponding to Pmax; **W** – watt; **rpm** – number of rotations per minute; **NS** – non-significant.

**Supplementary Table 2** Relationships between muscle strength and power parameters and historical PA in the whole group.

|                             | 12-34 years<br>(hours/year) | 12-34 years<br>(MET · hour ·<br>year <sup>-1</sup> ) | 35-49 years<br>(hours/year) | 35-49 years<br>(MET · hour ·<br>year <sup>-1</sup> ) | Over 50 years<br>(hours/year) | Over 50 years<br>(MET · hour ·<br>year <sup>-1</sup> ) | Over 12 years<br>(hours/year) | Over 12 years<br>(MET · hour ·<br>year <sup>-1</sup> ) | Last 5 years<br>(hours/year) | Last 5 years<br>(MET · hour ·<br>year <sup>-1</sup> ) | Last 10 years<br>(hours/year) | Last 10 years<br>(MET · hour ·<br>year <sup>-1</sup> ) |
|-----------------------------|-----------------------------|------------------------------------------------------|-----------------------------|------------------------------------------------------|-------------------------------|--------------------------------------------------------|-------------------------------|--------------------------------------------------------|------------------------------|-------------------------------------------------------|-------------------------------|--------------------------------------------------------|
| Handgrip strength           | 0.110                       | 0.180                                                | -0.013                      | 0.091                                                | 0.052                         | 0.149                                                  | -0.025                        | 0.103                                                  | -0.021                       | 0.100                                                 | -0.079                        | 0.041                                                  |
| Leg Extension<br>1RM R (KG) | 0.043                       | 0.119                                                | -0.259                      | -0.204                                               | -0.259                        | -0.075                                                 | -0.132                        | -0.072                                                 | -0.147                       | -0.024                                                | -0.186                        | -0.085                                                 |
| Leg Extension<br>1RM L (KG) | 0.045                       | 0.118                                                | -0.217                      | -0.147                                               | -0.190                        | 0.005                                                  | -0.065                        | -0.004                                                 | -0.105                       | 0.030                                                 | -0.145                        | -0.028                                                 |
| Leg Press<br>1RM (KG)       | -0.208                      | -0.159                                               | -0.175                      | -0.082                                               | -0.114                        | 0.022                                                  | -0.080                        | -0.024                                                 | -0.069                       | 0.046                                                 | -0.113                        | 0.026                                                  |
| Wrist                       | -0.168                      | -0.103                                               | -0.287*                     | -0.201                                               | -0.178                        | -0.039                                                 | -0.174                        | -0.152                                                 | -0.224                       | -0.113                                                | -0.175                        | -0.087                                                 |
| Elbow<br>Extension          | 0.074                       | 0.094                                                | -0.172                      | -0.074                                               | -0.280                        | -0.029                                                 | 0.107                         | 0.080                                                  | -0.104                       | 0.039                                                 | -0.159                        | 0.041                                                  |
| Elbow<br>Flexion            | 0.089                       | 0.174                                                | -0.189                      | -0.087                                               | -0.159                        | 0.072                                                  | -0.094                        | 0.016                                                  | -0.132                       | 0.056                                                 | -0.210                        | -0.032                                                 |
| Shoulder<br>Extension       | 0.157                       | 0.201                                                | -0.135                      | -0.040                                               | -0.136                        | 0.074                                                  | 0.032                         | 0.110                                                  | -0.065                       | 0.098                                                 | -0.075                        | 0.062                                                  |
| Shoulder<br>Flexion         | 0.143                       | 0.183                                                | -0.139                      | -0.034                                               | -0.077                        | 0.128                                                  | -0.086                        | 0.083                                                  | -0.158                       | -0.014                                                | -0.209                        | -0.031                                                 |
| Shoulder<br>Abduction       | 0.209                       | 0.233                                                | -0.101                      | -0.074                                               | -0.114                        | -0.007                                                 | -0.020                        | 0.046                                                  | -0.059                       | 0.010                                                 | -0.080                        | -0.024                                                 |
| Hip<br>Flexion              | 0.219                       | 0.253                                                | 0.012                       | 0.078                                                | 0.000                         | 0.118                                                  | 0.055                         | 0.087                                                  | -0.077                       | 0.037                                                 | -0.082                        | -0.044                                                 |

|                                             |         |         |         |        |         |        |        |        |        |        |         |        |
|---------------------------------------------|---------|---------|---------|--------|---------|--------|--------|--------|--------|--------|---------|--------|
| Hip Abduction                               | 0.444** | 0.461** | 0.047   | 0.056  | 0.159   | 0.150  | 0.174  | 0.236  | 0.149  | 0.181  | 0.085   | 0.113  |
| Ankle Dorsiflexion                          | 0.210   | 0.256   | -0.007  | 0.067  | 0.022   | 0.090  | 0.026  | 0.115  | -0.040 | 0.047  | -0.085  | -0.029 |
| Knee Extension                              | 0.206   | 0.260   | -0.308* | -0.226 | -0.183  | -0.022 | 0.059  | 0.059  | -0.114 | 0.023  | -0.126  | 0.007  |
| Knee Flexion                                | 0.063   | 0.089   | -0.183  | -0.179 | -0.187  | -0.150 | -0.067 | -0.159 | -0.119 | -0.069 | -0.184  | -0.155 |
| P40% LE R (W)                               | 0.016   | 0.069   | -0.213  | -0.148 | -0.203  | -0.026 | -0.087 | -0.043 | -0.117 | 0.006  | -0.140  | -0.034 |
| P70% LE R (W)                               | -0.035  | 0.018   | -0.246  | -0.171 | -0.215  | -0.035 | -0.108 | -0.019 | -0.118 | 0.002  | -0.142  | -0.007 |
| P40% LE L (W)                               | -0.002  | 0.062   | -0.268* | -0.179 | -0.245  | -0.045 | -0.103 | -0.040 | -0.183 | -0.052 | -0.228  | -0.097 |
| P70% LE L (W)                               | -0.064  | -0.012  | -0.312* | -0.247 | -0.300* | -0.117 | -0.198 | -0.137 | -0.248 | -0.145 | -0.327* | -0.211 |
| P40% LP (W)                                 | -0.047  | 0.014   | -0.234  | -0.134 | -0.197  | -0.049 | -0.021 | 0.026  | -0.142 | 0.004  | -0.204  | -0.041 |
| P70% LP (W)                                 | -0.110  | -0.034  | -0.285* | -0.162 | -0.257  | -0.091 | -0.077 | 0.011  | -0.188 | -0.050 | -0.247  | -0.084 |
| Pmax (W)                                    | 0.018   | 0.057   | -0.062  | -0.052 | -0.133  | -0.105 | -0.108 | -0.030 | -0.115 | -0.049 | -0.174  | -0.099 |
| Pmax·kg <sup>-1</sup> (W·kg <sup>-1</sup> ) | 0.111   | 0.150   | 0.057   | 0.072  | -0.049  | -0.040 | -0.020 | 0.062  | -0.063 | 0.023  | -0.086  | 0.005  |
| u <sub>opt</sub> (rpm)                      | -0.024  | 0.043   | 0.026   | 0.020  | 0.013   | -0.038 | -0.036 | 0.042  | -0.022 | 0.041  | -0.069  | -0.042 |

Abbreviations: **1RM R** – one repetition maximum, right leg; **1RM L** – one repetition maximum, left leg; **P40% LE R** – muscle power of low force/high velocity (40%), leg extension, right leg; **P70% LE R** – muscle power of high force/low velocity (70%), leg extension, right leg; **P40% LE L** – muscle power of low force/high velocity (40%), leg extension, left leg; **P70% LE L** – muscle power of high force/low velocity (70%), leg extension, left leg; **P40% LP** – muscle power of low force/high velocity (40%), leg press; **P70% LP** – muscle power of high force/low velocity (70%), leg press; **Pmax** – maximal short-term power; **Pmax·kg<sup>-1</sup>** – maximal short-term power relative to body mass; **u<sub>opt</sub>** – optimal movement velocity corresponding to Pmax; **W** – watt; **rpm** – number of rotations per minute, **MET** – Metabolic Equivalent of Task.

\* p <0.05; \*\* p <0.01

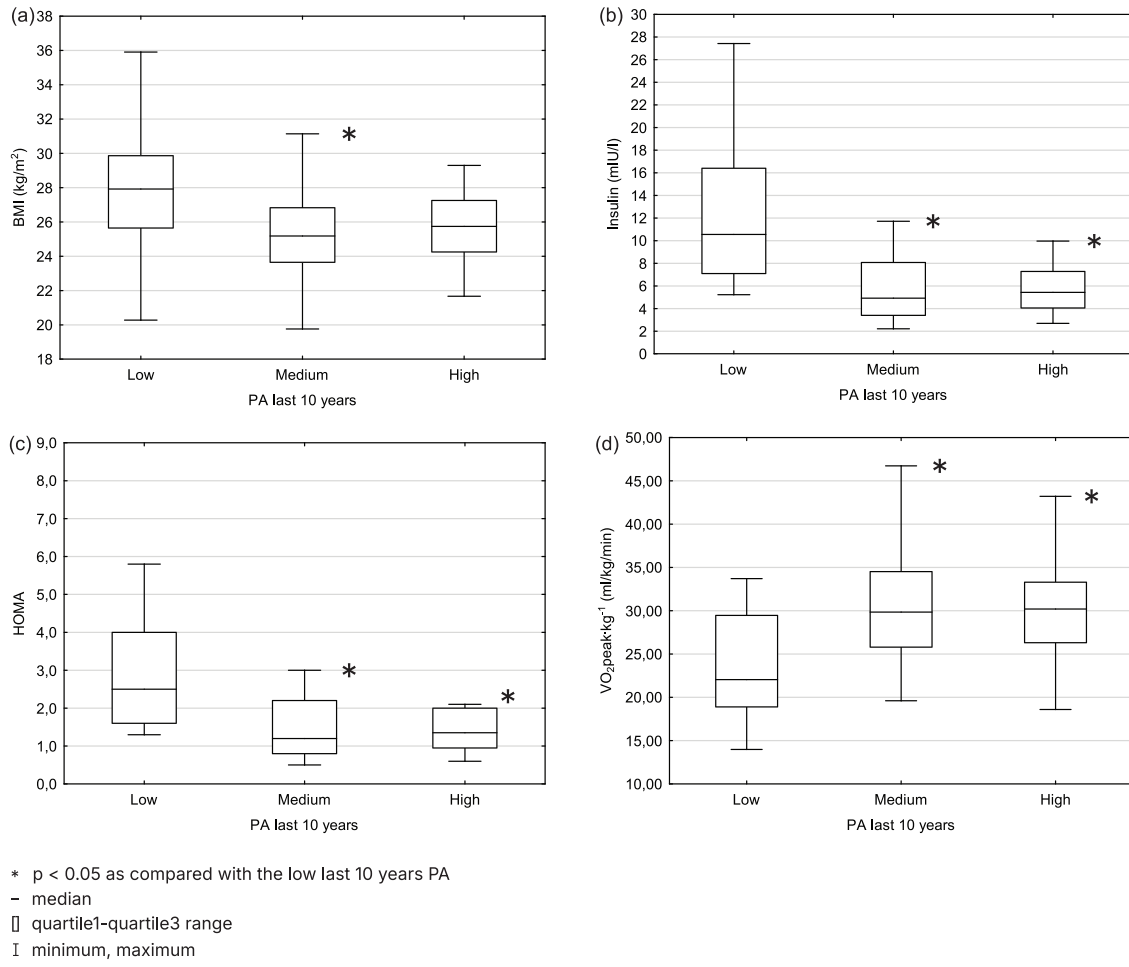

**Supplementary Figure 1** BMI, HOMA, insulin and aerobic power in participants characterized with low, medium and high historical PA in the last 10 years.

Anaerobic power/kg:  $P_{max} \cdot kg^{-1} (W \cdot kg^{-1}) = 6.0789 + 0.00057425 \cdot x;$   
 $r = 0.031; p = 0.81$   
 Aerobic power/kg:  $PWC85\%HR_{max} \cdot kg^{-1} (W \cdot kg^{-1}) = 1.3419 + 0.000146 \cdot x;$   
 $r = 0.309; p = 0.02$

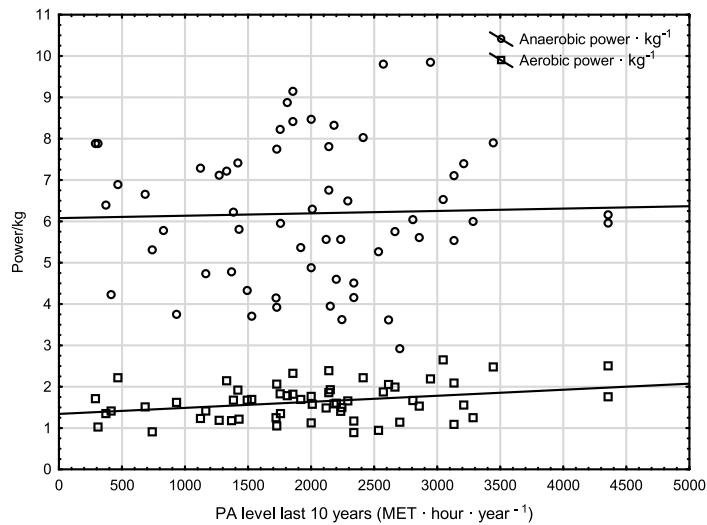

**Supplementary Figure 2** The relationships between aerobic and anaerobic power relative to body mass and the last 10 years PA level.
